# Supplementary material for: A highly efficient catalytic system for cross-coupling of aryl chlorides and bromides with malononitrile anion by palladium carbene complexesElectronic supplementary information (ESI) available: experimental details. See http://www.rsc.org/suppdata/cc/b3/b302890a/
Source: Royal Society of Chemistry journal article supplement (doi:10.1039/b302890a), 2003-01-01
Supplement: b302890a.doc [file b302890a.doc]

Comm Ref. B302890A

## Supporting information

A Highly Efficient Catalytic System for Cross-Coupling of Aryl Chlorides and Bromides with Malononitrile Anion by Palladium Carbene Complexes

Chengwei Gao, Xiaochun Tao, Yanlong Qian, and Jiling Huang*

**General**: The melting point was uncorrected. IR spectra were recorded on Nicolet Magna- IR 550 spectrometer. 1H and 13C NMR were measured on a Bruker AVANCE-500 MHz and a Bruker AC-300 MHz NMR spectrometer with TMS as internal standard. MS spectra were recorded on a HP 5989A instrument.

**Materials**: Malononitrile was distilled from P2O5 .Pyridine was distilled from CaH2. Aryl halides were purchased from Shanghai Chemical & Reagent Co. and distilled prior to use.

**Imidazolium salts** (**1** – **6**) were prepared according to the literatures. 1

**Representative procedure:** To a predried schlenk flask under a dry argon atmosphere were added the dry pyridine (3mL), imidazolium salt (0.023 mmol for ArBr or 0.035 mmol for ArCl), NaH (2.6mmol). Stirred at ambient temperature for half an hour. Then Pd (dba) 2 (0.01 mmol for ArBr or 0.015mmol for ArCl) was added and the mixture was stirred for another 15 minutes. Followed by addition of malononitrile (1.25mmol) and aryl halide (1mmol). Then Sealed with a stopper and the mixture was heated in an oil bath for a certain time (10 – 16h). All reactions were monitored by TLC. .Pyridine was removed by distillation under reduced pressure with > 90% recovery. After quenching with dilute hydrochloric acid (8mL), the product was extracted with 315mL diethylether, washed with 210mL brine, dried over Na2SO4, filtered and concentrated. The crude orange oil was then purified by silica gel column chromatography (petrol ether / ethyl acetate, 8:1) and recrystallization in a mixture of petrol ether and dichloromethane to afford the corresponding arylmalononitrile. The products of coupling were identified by means of 1HNMR and mp, which are in agreement with literature data. 2 Isolated yields are based on aryl halides and the average of two runs after chromatography.

Data for **imidazolium salt** **5**: C27H37N2Cl, FW 425.02; white powder, mp. 225 0 C(dec). IR (KBr): 3160, 3045, 2967, 2933,2873, 2759, 1626, 1601, 1534, 1463, 1377, 1319, 1255, 1220, 1159, 1051, 880, 766, 700cm-1. 1HNMR( 500MHz, CDCl3):  10.28( s, 1H, NCHN), 7.88( s, 2H,CHCH), 7.11( s, 4H, Ph), 2.70(q, J = 7.6Hz, 4H, 2 C*H*2CH3), 2.46(q, = 7.6Hz, 4 C*H*2CH3), 1.29( t, J = 7.6Hz, 6H, 2 CH2C*H*3), 1.20 ( t, J = 7.6Hz, 12H, 4CH2C*H*3 ). 13CNMR(300 MHz, CDCl3):  148.2(CH), 140.1(CH), 138.9(C), 129.6(C), 127.1(C), 126.1(CH), 29.0(CH2), 24.5(CH2), 15.5(CH3), 15.2(CH3) . MS e/z (%): 389(M-Cl, 15), 388(M-Cl –1, 60), 387(M-Cl –2, 100), 371(10), 359(M-CH2CH2, 7), 201(14%), 188(52), 186(22), 172(16), 160(8), 144(5), 115(6), 105(5), 91(4), 77(3), 64(23), 48(8).

**Data for imidazolium salt** **6**:C33H49N2Cl, 509.18, white powder, mp.230 0 C (dec). IR (KBr): 3133, 3062, 2964, 2929, 1637, 1602, 1539, 1465, 1364, 1326, 1224, 1184, 1103, 1053, 939, 884, 797, 694cm-1. 1HNMR(500MHz, CDCl3):  9.38(s, 1H), 8.22( s, 2H), 7.18( s, 4H), 2.99(sept, J = 7Hz, 2H, 2C*H*(CH3)2), 2.45(bs, 4H, 4C*H*(CH3)2), 1.31( d, J = 6.8Hz, 24H, 4CH(C*H*3)2), 1.23( d, J = 7Hz, 12H, 2CH(C*H*3)2). 13CNMR(300 MHz, CDCl3):  153.2(CH), 144.9(CH), 138.0(C), 127.8(C), 127.3(C), 122.8(CH), 34.7(CH2), 29.3(CH2), 24.9(CH3), 24.0(CH3), 23.9(CH3). MS e/z (%): 473((M-Cl, 12), 472(M-Cl-1, 51), 471(M-Cl-2, 100), 457(12), 441(8), 429(4), 387(3), 381(2), 269(2), 244(4), 230(24), 228(43), 200(22), 188(13), 186(10), 172(5), 146(6), 129(2), 91(3), 43(4).

1. W.A. Herrmann, L.J. Gossen, C. Köcher and G.R.J. Artus, *Angew. Chem., Int. Ed. Engl*. 1996, **35**, 2805; A.J. Arduengo III, R, Krafczyk and R. Schmutzler, Tetrahedron, 1999, **55**, 14523; A.J. Arduengo III, H.V.R. Dias, R.L. Harlow and M. Kline, *J. Am. Chem. Soc.,* 1992, **112**, 5530.
2. W. A. Davis and M. P. Cava, *J. Org. Chem*. 1983, **48**, 2774; E. B. Troughton, K. E. Molter and E. M. Arnett, *J. Am. Chem. Soc*. 1984, **106**, 6726; T. Shigetoshi, M. Uno, S. Koji, JP 60197650 A2(1985); T. Shigetoshi, M. Uno, S. Koji, JP 60294753 A2 ( 1985); M. A. Ciufolini and M. E. Browne, *Tetrahedron* *lett.,* 1987, **28**, 171; D.H.R. Barton, D.M.X. Donnelly, J.-P. Finet and P.H. Stenson, *Tetrahedron*, 1988, **44**, 6387; K. Okuro, M. Furuune, M. Miura and M. Nomura, *J. Org. Chem.,* 1993, **58**, 7606; G.J. Quallich, T.W. Makoski, A.F. Sanders, F.J. Urban and E. Vazquez, *J. Org. Chem.,* 1998, **63**, 4116.
